# Supplementary material for: MiR-146a induction by cyanobacterial lipopolysaccharide antagonist (CyP) mediates endotoxin cross-tolerance
Source: PubMed Central journal article supplement (PMC6063882; doi:10.1038/s41598-018-29820-w), 2018-07-27

MiR-146a induction by cyanobacterial lipopolysaccharide antagonist (CyP) mediates endotoxin cross-tolerance

Monica MOLTENI, Annalisa BOSI, Vincenzo SATURNI, Carlo ROSSETTI

Figure S1.

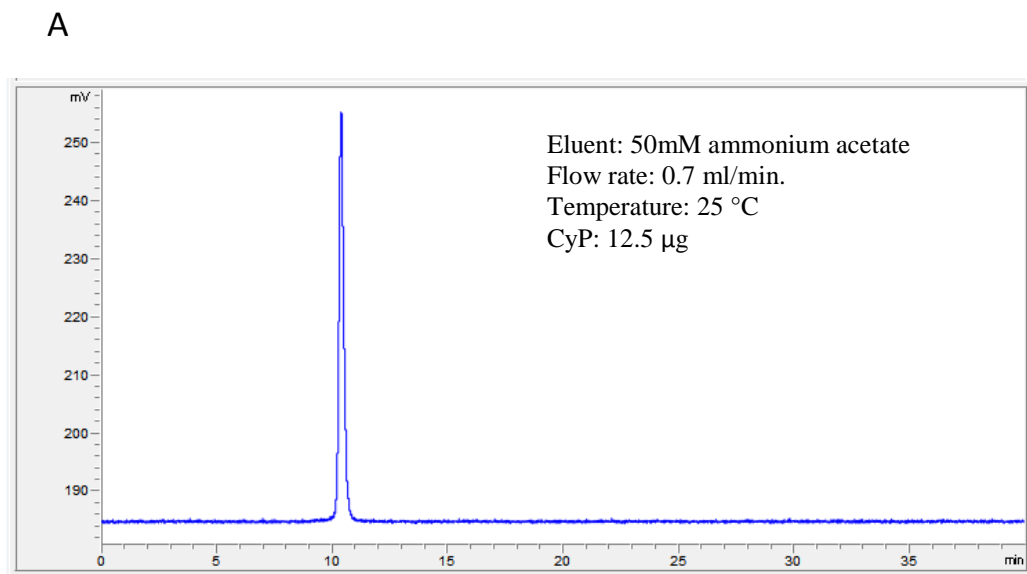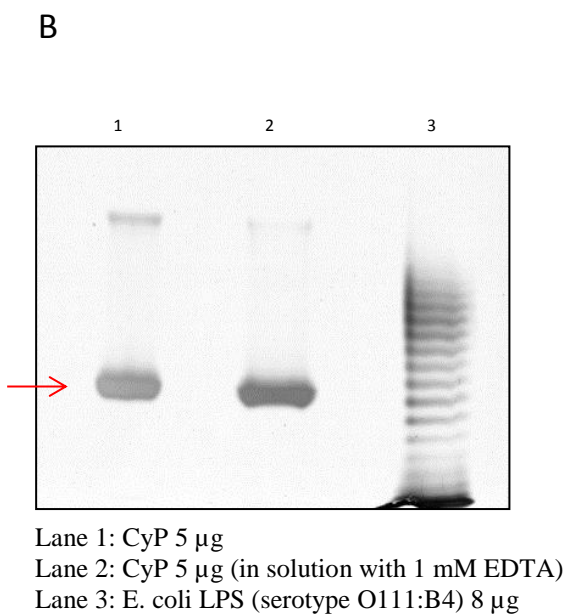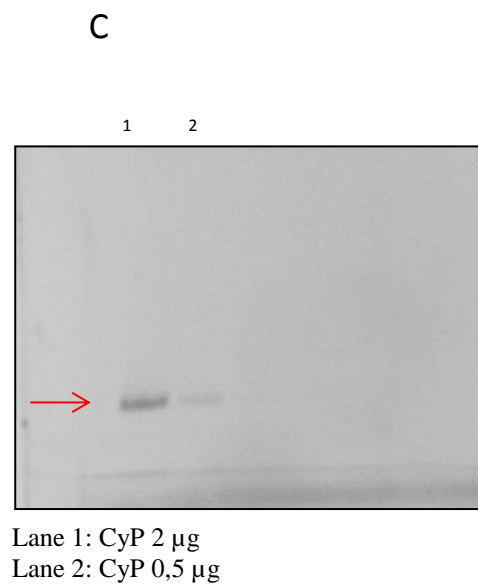

MiR-146a induction by cyanobacterial lipopolysaccharide antagonist (CyP) mediates endotoxin cross-tolerance

Monica MOLTENI, Annalisa BOSI, Vincenzo SATURNI, Carlo ROSSETTI

Figure S2.

A

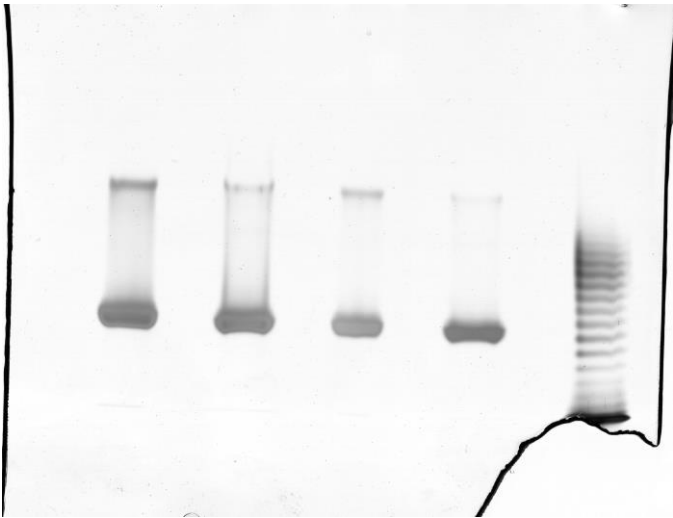

B

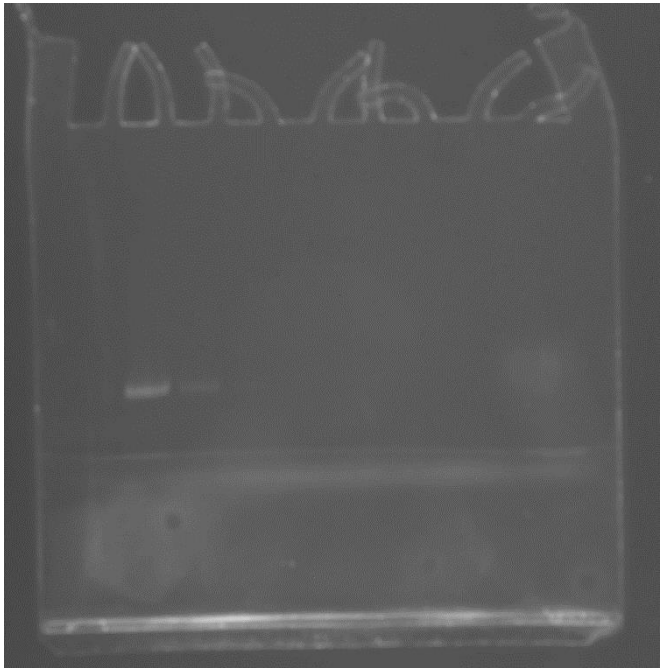

Supplement: 41598_2018_29820_MOESM1_ESM.pdf [file 41598_2018_29820_MOESM1_ESM.pdf]
